# Supplementary material for: Hydrogen Peroxide Induced Cell Death: The Major Defences Relative Roles and Consequences in E. coli
Source: PubMed Central journal article supplement (PMC4975445; doi:10.1371/journal.pone.0159706), 2016-08-05
Supplement: pone.0159706.s001.pdf [file pone.0159706.s001.pdf]

# Supporting Information

## Superoxide kinetics

Superoxide is involved in the following kinetically significant reactions:  
Its production :

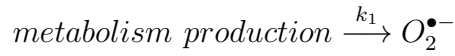

Its three ways of dismutation (by SOD, by GSH and spontaneously)

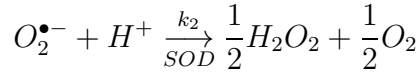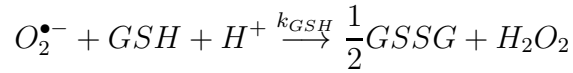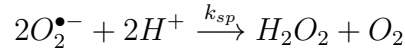

Those reactions lead to the following ordinary differential equation (ODE) coming from the balance between production and consumption:

$$\frac{d [O_2^{\bullet-}]}{dt} = k_1 - k_2 [SOD] [O_2^{\bullet-}] - k_{GSH} [GSH] [O_2^{\bullet-}] - 2k_{sp} [O_2^{\bullet-}]^2$$

The kinetic constants used in this work are gathered in the table 1 (concerning superoxide) according to Imlay and Fridovich (1991).

| Constants      | Value                                                                |
|----------------|----------------------------------------------------------------------|
| $k_1$          | $5.7 \times 10^{-6} \text{ mol}\cdot\text{L}^{-1}\cdot\text{s}^{-1}$ |
| $k_2[SOD]$     | $2.8 \times 10^4 \text{ s}^{-1}$                                     |
| $k_2$          | $1.5 \times 10^9 \text{ mol}^{-1}\cdot\text{L}\cdot\text{s}^{-1}$    |
| $k_{GSH}[GSH]$ | $1.3 \times 10^1 \text{ s}^{-1}$                                     |
| $k_{GSH}$      | $2.6 \times 10^3 \text{ mol}^{-1}\cdot\text{L}\cdot\text{s}^{-1}$    |
| $k_{sp}$       | $5.0 \times 10^5 \text{ mol}^{-1}\cdot\text{L}\cdot\text{s}^{-1}$    |

Table 1: Kinetic constants used to describe superoxide evolution.

# Superoxide evolution

## Without exogenous stress

### In the wild-type strain

In the wild-type strain, the resolution of  $O_2^{\bullet-}$  concentration gives :

$$[O_2^{\bullet-}] \approx [O_2^{\bullet-}]_{\infty} (1 - e^{-k_2[SOD]t})$$

indeed  $GSH$  and spontaneous dismutation are negligible because  $k_{sp} \ll k_{GSH} [GSH] \ll k_2 [SOD]$  *the*.  $O_2^{\bullet-}$  concentration rapidly reached its steady-state value, in less than 1 ms, actually the characteristic time is given by  $\frac{1}{k_2[SOD]}$ . This time, which was dependent solely on  $SOD$  concentration and the  $SOD$  catalytic degradation rate  $k_2$ , corresponds to the characteristic time require for the re-establishment of equilibrium.

If we assume that  $SOD$  concentration and  $O_2^{\bullet-}$  production change over time, and that their equilibrium time values are probably significantly shorter than 1 ms, then the steady-state value of  $O_2^{\bullet-}$  concentration is always reached but depends purely on  $O_2^{\bullet-}$  production rate and  $SOD$  catalytic degradation rate ( $k_2$ ), which are time-dependent.

For each time, we can write that the  $O_2^{\bullet-}$  concentration is  $[O_2^{\bullet-}](t) = \frac{k_1(t)}{k_2[SOD](t)}$ . For example, with published values (Imlay and Fridovich, 1991),  $O_2^{\bullet-}$  concentration is  $2.1 \times 10^{-10}$  M : this value fits the Imlay prediction well, and it corresponds to the equilibrium between  $O_2^{\bullet-}$  production (parameter  $k_1$ ) and the rate of scavenging of this radical by  $SOD$ .

We confirmed this approximation, by comparing the analytical solution ( $\blacktriangle$ ) with the numerical solution ( $\blacksquare$ ) in figure 1. Indeed this comparison help us to check whether the suggested approximations used to find an analytical expression are valid.

In a wild strain, the two major reaction involving superoxide are its production and its consumption by  $SOD$ .

### In a $SOD(-)$ mutant

In a  $SOD(-)$  mutant, changes in  $O_2^{\bullet-}$  concentration were explained principally by the following differential equation :

$$\frac{d [O_2^{\bullet-}]}{dt} = k_1 - k_{GSH} [GSH] [O_2^{\bullet-}]$$

The resolution of  $O_2^{\bullet-}$  concentration gave:  $[O_2^{\bullet-}] \approx [O_2^{\bullet-}]_{\infty} (1 - e^{-k_{GSH}[GSH]t})$ , which rapidly reached its steady-state value, in less than 0.5 s. Actually the characteristic time is  $\frac{1}{k_{GSH}[GSH]}$ . This time, which was dependent only on  $GSH$  concentration and the  $GSH$  catalytic degradation rate  $k_{GSH}$ , corresponds to the characteristic time required for the re-establishment of equilibrium.

If we assume that  $GSH$  concentration and  $O_2^{\bullet-}$  production can change over time, and that their equilibrium time values are probably significantly shorter than 0.5 s, then the steady state value of  $O_2^{\bullet-}$  concentration is always reached but is dependent purely on  $O_2^{\bullet-}$  production rate and the  $GSH$  catalytic degradation rate  $k_{GSH}$ , which are time-dependent.

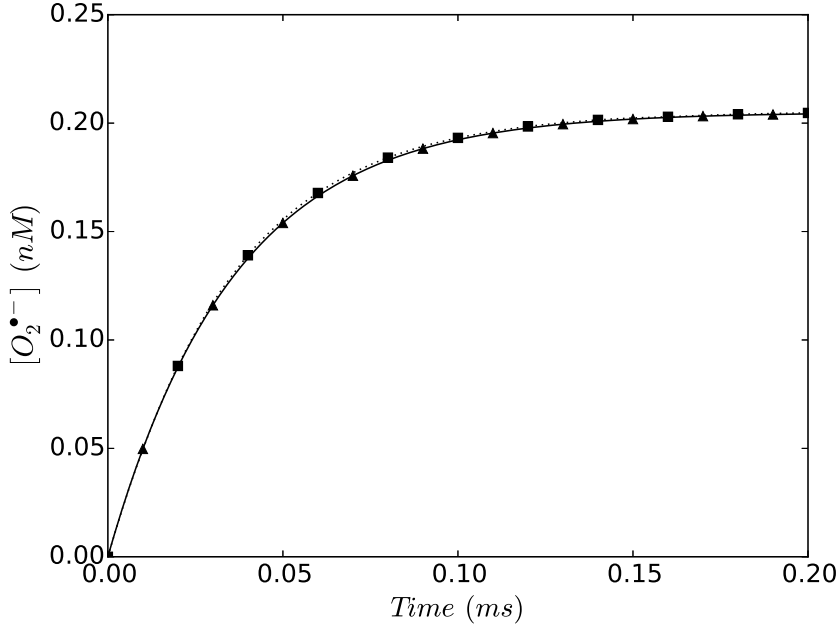

Figure 1: Change in  $O_2^{\bullet-}$  concentration in the *E. coli* wild-type strain. (▲) corresponds to the analytical solution according to the simplified system and (■) corresponds to whole model solved with numerical methods. Cell density has no influence on the pattern of superoxide concentration evolution.

Fig1

For each time point, we can write that  $O_2^{\bullet-}$  concentration is  $[O_2^{\bullet-}](t) = \frac{k_1(t)}{k_{GSH}[GSH](t)}$ . For example, with published values (Imlay and Fridovich, 1991),  $O_2^{\bullet-}$  concentration is  $4.4 \times 10^{-7}$  M. This value is consistent with the predictions of Imlay and corresponds to the equilibrium between  $O_2^{\bullet-}$  production (parameter  $k_1$ ) and the rate of scavenging of this radical by *GSH*.

For confirmation of this approximation, we compared (figure 2) the analytical solution (▲) with the numerical one (■):

### In a *SOD(-) GSH(-)* mutant

In a *SOD(-) GSH(-)* mutant, the change in  $O_2^{\bullet-}$  concentration can be explained principally by the following differential equation according to the spontaneous dismutation:

$$\frac{d [O_2^{\bullet-}]}{dt} = k_1 - 2k_{sp} [O_2^{\bullet-}]^2$$

$O_2^{\bullet-}$  concentration obeys the function :

$$[O_2^{\bullet-}] = [O_2^{\bullet-}]_{\infty} \frac{1 - e^{-t/2\tau}}{1 + e^{-t/2\tau}}$$

where  $\tau = \frac{1}{\sqrt{2k_1k_{sp}}}$  and  $[O_2^{\bullet-}]_{\infty} = \sqrt{\frac{k_1}{2k_{sp}}}$

$O_2^{\bullet-}$  concentration rapidly reaches its steady-state  $[O_2^{\bullet-}]_{\infty}$  value, in less than 1 s ( $\tau$  is the characteristic time). This time, which is dependent solely on the dismutation rate  $k_{sp}$ , corresponds to the characteristic time required to re-establish equilibrium.

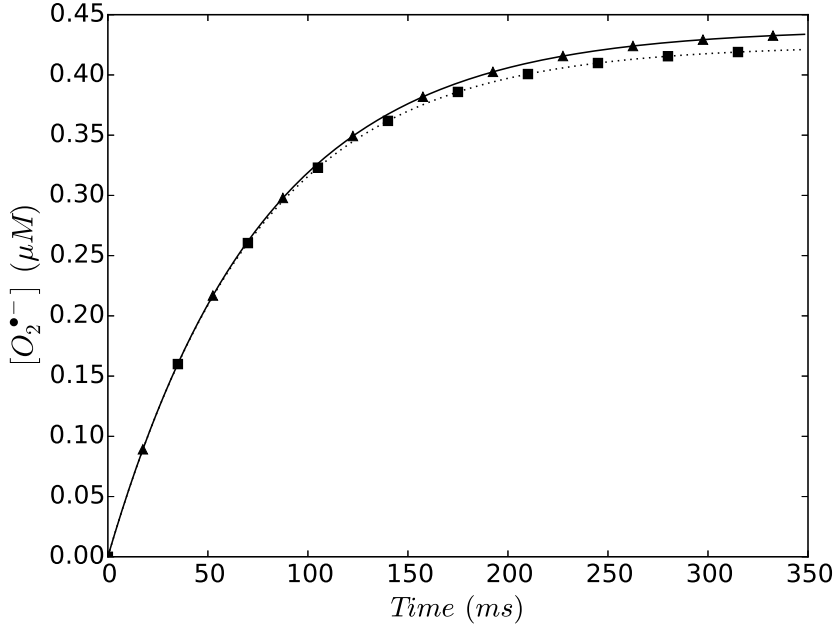

Figure 2: Changes in  $O_2^{\bullet-}$  concentration in a  $SOD(-)$  mutant. (▲) corresponds to the analytical solution according to the simplified system and (■) corresponds to the whole model solved with numerical methods. Cell concentration has no influence on this pattern of superoxide concentration evolution.

If we assume that  $O_2^{\bullet-}$  production can change over time, and that the equilibrium time is probably significantly shorter than 1 s, then the steady-state value of  $O_2^{\bullet-}$  concentration is always reached but is dependent purely on  $O_2^{\bullet-}$  production rate, which is time-dependent.

For each time point, we can write that  $O_2^{\bullet-}$  concentration is  $[O_2^{\bullet-}](t) \approx \sqrt{\frac{k_1(t)}{2k_{sp}}}$ . With published values, the  $O_2^{\bullet-}$  concentration is  $2.4 \times 10^{-6}M$ , a value consistent with the predictions of Imlay (2001), and corresponding to the equilibrium between  $O_2^{\bullet-}$  production (parameter  $k_1$ ) and its spontaneous dismutation.

The analytical solution (▲) and the numerical solution (■) are the identical because they solved the same system (figure 3).

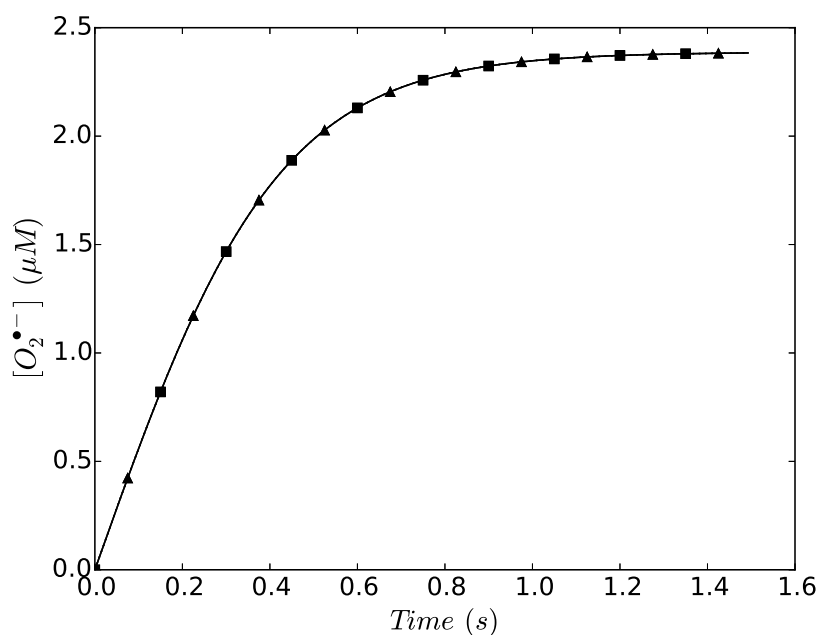

Figure 3: Change in  $O_2^{\bullet-}$  concentration in  $SOD(-) GSH(-)$  mutants. (▲) corresponds to the analytical solution according to the simplified system and (■) corresponds to the whole model with numerical methods. Cell concentration has no influence on this pattern of superoxide concentration evolution.

## Superoxide summary

The table 2 summarizes the superoxide steady-state concentrations.

| $[O_2^{\bullet-}]$ (mol L <sup>-1</sup> ) | In this work          | Imlay, Fridovich      |
|-------------------------------------------|-----------------------|-----------------------|
| Wild type                                 | $2.1 \times 10^{-10}$ | $2.0 \times 10^{-10}$ |
| SOD(-) GSH(+)                             | $4.2 \times 10^{-7}$  | $4.9 \times 10^{-7}$  |
| SOD(-) GSH(-)                             | $2.4 \times 10^{-6}$  | $6.7 \times 10^{-6}$  |

Table 2: Superoxide steady-state concentration. At steady state, the internal concentration is shown for cells in LB at 37 °C without exogenous hydrogen peroxide.

In a wild-type strain,  $Fe$  concentration is 10  $\mu M$ , and, in a  $SOD^-$  strain,  $Fe$  concentration is 80  $\mu M$  (Keyer and Imlay, 1996).

## References

Imlay JA, Fridovich I, Assay of metabolic superoxide production in *Escherichia coli*. *J. Biol. Chem.* 1991;266.11: 69576965.

Keyer K, Imlay JA, Superoxide accelerates DNA damage by elevating free-iron levels. *Proc. Natl. Acad. Sci. U.S.A.* 1996;93.24: 13635 13640.
